# Supplementary material for: Prior experience of captivity affects behavioural responses to ‘novel’ environments
Source: PeerJ. 2022 Aug 30;10:e13905. doi: 10.7717/peerj.13905 (PMC9438767; doi:10.7717/peerj.13905)
Supplement: Supplemental Information 3 [file peerj-10-13905-s003.xlsx]

## Sheet: datafile_explorationGT2022
bird_id	date_caught	March_day	days_captivity	experience	sex	age	order_c.r	bodyweight	test	exploration_2m	T_30breaths	breath_s	Mir_pecks	T_looks	Mir_look_s	Perch2_mirror	Perch5_mirror	P2_mir	P5_mir	time_in_mirror	mov_mir	mov_mir_s	Perch2_expl	Perch5_expl	P2_expl	P5_expl	time_expl_side	moves_exploration	mov_expl_s	PC1
G145	21.3.2018	21	24	1	MALE	1	0	17.75	CAGE	21	15.84	1.89394	54	275	0.916667	15	228	0.05	0.76	300	59	0.196667	14	4	0.197183	0.056338	71	16	0.225352	4.78201
G15	19.3.2018	19	15	1	MALE	1	0	18.75	CAGE	14	13.77	2.17865	9	210	0.7	9	70	0.03	0.233333	300	45	0.15	137	0	0.685	0	200	31	0.155	0.959614
G153	27.3.2018	27	28	1	MALE	1	0	18.5	CAGE	56	13.44	2.23214	7	196	0.653333	54	61	0.18	0.203333	300	192	0.64	188	7	0.508108	0.0189189	370	215	0.581081	0.570654
G192	17.3.2018	17	23	1	FEMALE	1	0	19	CAGE	0	12.83	2.33827	0	260	0.866667	174	0	0.58	0	300	1	0.00333333	106	0	0.353333	0	300	5	0.0166667	-1.02243
G195	20.3.2018	20	12	1	FEMALE	1	1	17	CAGE	0	15.06	1.99203	0	300	1	1	0	0.00333333	0	300	0	0	298	0	0.990033	0	301	1	0.00332226	-0.25814
G204	20.3.2018	20	10	1	FEMALE	1	1	20	CAGE	4	12.47	2.40577	18	241	0.803333	16	143	0.0533333	0.476667	300	108	0.36	271	2	0.662592	0.00488998	409	51	0.124694	3.05292
G209	24.3.2018	24	9	1	MALE	1	1	19	CAGE	1	17.16	1.74825	0	146	0.486667	84	23	0.28	0.0766667	300	46	0.153333	205	0	0.520305	0	394	2	0.00507614	-0.0440962
G212	27.3.2018	27	9	1	MALE	1	0	17.25	CAGE	39	19.91	1.50678	15	242	0.806667	58	124	0.193333	0.413333	300	118	0.393333	174	14	0.476712	0.0383562	365	152	0.416438	1.56408
G240	22.3.2018	22	29	1	FEMALE	1	1	19.75	CAGE	0	14.77	2.03114	0	132	0.44	251	0	0.836667	0	300	5	0.0166667	277	0	1	0	277	0	0	-0.92866
G249	18.3.2018	18	17	1	FEMALE	1	1	19.5	CAGE	0	11.27	2.66193	0	185	1	185	0	1	0	185	0	0	301	0	1	0	301	0	0	-0.787179
G251	18.3.2018	18	15	1	FEMALE	0	1	18	CAGE	2	14.15	2.12014	29	250	0.833333	159	93	0.53	0.31	300	82	0.273333	266	0	0.647202	0	411	70	0.170316	2.4859
G254	18.3.2018	18	15	1	MALE	0	1	18	CAGE	1	14.84	2.02156	0	26	0.0866667	300	0	1	0	300	0	0	600	0	1	0	600	1	0.00166667	-1.23321
G260	20.3.2018	20	16	1	MALE	0	1	18	CAGE	12	15.82	1.89633	10	172	0.573333	68	92	0.226667	0.306667	300	64	0.213333	205	7	0.657051	0.0224359	312	40	0.128205	1.25768
G262	16.3.2018	16	12	1	FEMALE	0	1	18	CAGE	13	11.34	2.6455	0	244	0.813333	157	37	0.523333	0.123333	300	78	0.26	0	0	0	0	101	28	0.277228	-0.712891
G263	17.3.2018	17	8	1	MALE	0	0	18.75	CAGE	26	13.63	2.20103	8	198	0.66	48	97	0.16	0.323333	300	130	0.433333	110	16	0.30303	0.0440771	363	103	0.283747	1.13458
G264	24.3.2018	24	8	1	MALE	0	0	18.25	CAGE	2	14.91	2.01207	15	159	0.53	42	123	0.14	0.41	300	71	0.236667	333	1	0.720779	0.0021645	462	33	0.0714286	2.33264
G276	23.3.2018	23	10	1	MALE	0	0	18.75	CAGE	3	11.07	2.71003	0	248	0.826667	291	0	0.97	0	300	0	0	25	0	0.111111	0	225	3	0.0133333	-1.37209
G281	18.3.2018	18	5	1	MALE	0	1	18	CAGE	2	13.52	2.21893	0	248	0.826667	1	0	0.00333333	0	300	1	0.00333333	2	0	0.0033389	0	599	2	0.0033389	-0.870679
G297	20.3.2018	20	12	1	MALE	1	1	19.5	CAGE	0	15.82	1.89633	0	181	0.967914	187	0	1	0	187	0	0	296	0	1	0	296	0	0	-0.802632
G318	18.3.2018	18	9	1	FEMALE	1	1	19.25	CAGE	0	11.93	2.51467	0	300	1	300	0	1	0	300	0	0	301	0	1	0	301	0	0	-0.787179
G319	27.3.2018	27	6	1	FEMALE	0	0	18	CAGE	0	15.44	1.94301	1	80	0.266667	227	9	0.756667	0.03	300	3	0.01	287	0	1	0	287	0	0	-0.803072
G327	16.3.2018	16	2	1	MALE	0	1	19	CAGE	0	11.85	2.53165	1	174	0.58	121	38	0.403333	0.126667	300	119	0.396667	0	0	0	0	246	2	0.00813008	0.563808
G342	22.3.2018	22	14	1	FEMALE	0	1	19.5	CAGE	34	13.34	2.24888	3	229	0.763333	16	41	0.0533333	0.136667	300	38	0.126667	52	9	0.297143	0.0514286	175	53	0.302857	-0.728061
G344	23.3.2018	23	8	1	MALE	1	0	20.25	CAGE	13	12.88	2.32919	1	207	0.69	5	13	0.0166667	0.0433333	300	4	0.0133333	54	0	0.482143	0	112	13	0.116071	-0.735775
G346	19.3.2018	19	0	0	MALE	0	0	18	CAGE	0	14.55	2.06186	12	213	0.71	20	141	0.0666667	0.47	300	91	0.303333	22	6	0.0730897	0.0199336	301	13	0.0431894	2.3265
G347	20.3.2018	20	0	0	FEMALE	0	1	16.75	CAGE	0	13.23	2.26757	0	107	0.356667	298	0	0.993333	0	300	0	0	301	0	1	0	301	0	0	-1.0944
G348	21.3.2018	21	0	0	MALE	1	0	19	CAGE	0	14.23	2.10822	0	138	0.46	45	33	0.15	0.11	300	120	0.4	59	12	0.213768	0.0434783	276	23	0.0833333	0.23084
G349	22.3.2018	22	0	0	FEMALE	0	1	16.75	CAGE	28	11.86	2.52951	15	230	0.766667	50	125	0.166667	0.416667	300	84	0.28	9	0	0.409091	0	22	5	0.227273	NA
G350	23.3.2018	23	0	0	MALE	0	0	19.5	CAGE	0	16.02	1.87266	0	280	0.933333	282	0	0.94	0	300	0	0	294	0	1	0	294	0	0	-0.795214
G351	26.3.2018	26	0	0	MALE	0	1	18.5	CAGE	0	16.44	1.82482	0	290	0.983051	295	0	1	0	295	0	0	279	0	1	0	279	0	0	-0.795342
G352	26.3.2018	26	0	0	FEMALE	0	1	19.75	CAGE	0	11	2.72727	1	203	0.676667	6	186	0.02	0.62	300	23	0.0766667	0	0	0	0	293	0	0	1.64132
G353	26.3.2018	26	0	0	FEMALE	0	1	19	CAGE	3	9.72	3.08642	0	208	0.693333	72	0	0.24	0	300	2	0.00666667	0	0	0	0	46	2	0.0434783	NA
G354	27.3.2018	27	0	0	FEMALE	0	0	16.75	CAGE	0	16.1	1.86335	1	76	0.253333	14	7	0.0466667	0.0233333	300	9	0.03	1	1	0.00332226	0.00332226	301	6	0.0199336	-0.992062
G355	28.3.2018	28	0	0	MALE	1	1	18.5	CAGE	6	13.3	2.25564	0	107	0.356667	73	0	0.243333	0	300	1	0.00333333	24	1	0.0406091	0.00169205	591	10	0.0169205	-1.29522
G356	27.3.2018	27	0	0	FEMALE	0	0	17.5	CAGE	3	11.2	2.67857	0	54	0.18	4	0	0.0133333	0	300	1	0.00333333	314	7	0.60501	0.0134875	519	36	0.0693642	-1.11649
G357	27.3.2018	27	0	0	FEMALE	1	0	16	CAGE	29	11.95	2.51046	1	179	0.596667	14	47	0.0466667	0.156667	300	112	0.373333	22	0	0.0740741	0	297	70	0.23569	0.171644
G358	28.3.2018	28	0	0	FEMALE	1	1	17	CAGE	2	11.4	2.63158	0	249	0.83	215	0	0.716667	0	300	1	0.00333333	25	0	0.892857	0	28	2	0.0714286	NA
G359	29.3.2018	29	0	0	MALE	0	1	17.5	CAGE	0	14.25	2.10526	0	266	0.886667	300	0	1	0	300	0	0	299	0	0.993355	0	301	1	0.00332226	-0.856616
G360	29.3.2018	29	0	0	FEMALE	0	1	18.75	CAGE	1	11.2	2.67857	0	28	0.256881	101	0	0.926606	0	109	4	0.0366972	0	0	0	0	293	1	0.00341297	-1.54315
G361	29.3.2018	29	0	0	MALE	0	1	18.5	CAGE	37	15.4	1.94805	9	215	0.716667	15	64	0.05	0.213333	300	95	0.316667	32	20	0.0981595	0.0613497	326	105	0.322086	0.258044
G362	29.3.2018	29	0	0	FEMALE	1	1	17.5	CAGE	3	14.35	2.09059	23	218	0.726667	21	113	0.07	0.376667	300	109	0.363333	29	1	0.0935484	0.00322581	310	15	0.0483871	2.91399
G363	29.3.2018	29	0	0	FEMALE	0	1	17.25	CAGE	0	13.1	2.29008	0	299	0.996667	300	0	1	0	300	0	0	290	0	0.966667	0	300	3	0.01	-0.838731
G364	29.3.2018	29	0	0	MALE	0	0	17.75	CAGE	25	13	2.30769	13	244	0.813333	10	97	0.0333333	0.323333	300	79	0.263333	25	19	0.0696379	0.0529248	359	86	0.239554	1.06363
G365	29.3.2018	29	7	1	FEMALE	1	0	17.25	CAGE	10	12.35	2.42915	28	149	0.496667	40	40	0.133333	0.133333	300	62	0.206667	23	0	0.2875	0	80	7	0.0875	1.69816
G366	30.3.2018	30	0	0	FEMALE	0	0	16.75	CAGE	0	13.65	2.1978	0	289	0.963333	300	0	1	0	300	0	0	301	0	1	0	301	0	0	-0.804839
G367	30.3.2018	30	0	0	MALE	0	0	17	CAGE	8	15.2	1.97368	4	127	0.423333	23	43	0.0766667	0.143333	300	81	0.27	94	5	0.390041	0.0207469	241	40	0.165975	0.221652
G368	30.3.2018	30	0	0	MALE	0	1	18.5	CAGE	47	12.6	2.38095	0	134	0.446667	64	8	0.213333	0.0266667	300	117	0.39	146	2	0.332574	0.00455581	439	148	0.33713	-0.734335
G369	30.3.2018	30	0	0	MALE	0	1	18.5	CAGE	0	12.65	2.37154	0	298	0.993333	300	0	1	0	300	0	0	3	0	0.01	0	300	5	0.0166667	-1.39127
G370	30.3.2018	30	0	0	FEMALE	0	1	17.25	CAGE	40	17.5	1.71429	0	258	0.86	1	0	0.00333333	0	300	1	0.00333333	112	5	0.30854	0.0137741	363	123	0.338843	-1.77195
G371	30.3.2018	30	0	0	MALE	0	0	19.5	CAGE	2	12.85	2.33463	0	7	0.0233333	0	0	0	0	300	1	0.00333333	590	0	0.986622	0	598	2	0.00334448	-0.71509
G372	30.3.2018	30	0	0	MALE	1	0	19	CAGE	3	13.7	2.18978	2	44	0.146667	20	11	0.0666667	0.0366667	300	23	0.0766667	2	0	0.00333333	0	600	3	0.005	-0.705185
G373	31.3.2018	31	0	0	MALE	1	1	17	CAGE	42	16.85	1.78042	22	212	0.706667	49	101	0.163333	0.336667	300	124	0.413333	93	28	0.384298	0.115702	242	98	0.404959	1.38116
G374	31.3.2018	31	0	0	FEMALE	0	1	16.5	CAGE	0	10.8	2.77778	0	4	0.0133333	300	0	1	0	300	0	0	301	0	0.993399	0	303	1	0.00330033	-1.27715
G375	31.3.2018	31	0	0	MALE	0	0	18.25	CAGE	0	16.7	1.79641	0	64	0.213333	300	0	1	0	300	0	0	300	0	0.996678	0	301	1	0.00332226	-1.17961
G376	31.3.2018	31	0	0	MALE	0	0	19.5	CAGE	0	15	2	0	243	0.81	300	0	1	0	300	0	0	3	0	0.01	0	300	3	0.01	-1.45533
G68	17.3.2018	17	23	1	MALE	1	0	19.5	CAGE	41	13.28	2.25904	0	172	0.573333	56	23	0.186667	0.0766667	300	138	0.46	310	12	0.645833	0.025	480	159	0.33125	-0.162745
G145	21.3.2018	21	24	1	MALE	1	1	17.75	ROOM	0
G15	19.3.2018	19	15	1	MALE	1	1	18.75	ROOM	4
G153	27.3.2018	27	28	1	MALE	1	1	18.5	ROOM	15
G192	17.3.2018	17	23	1	FEMALE	1	1	19	ROOM	17
G195	20.3.2018	20	12	1	FEMALE	1	0	17	ROOM	3
G204	20.3.2018	20	10	1	FEMALE	1	0	20	ROOM	19
G209	24.3.2018	24	9	1	MALE	1	0	19	ROOM	6
G212	27.3.2018	27	9	1	MALE	1	1	17.25	ROOM	18
G240	22.3.2018	22	29	1	FEMALE	1	0	19.75	ROOM	2
G249	18.3.2018	18	17	1	FEMALE	1	0	19.5	ROOM	5
G251	18.3.2018	18	15	1	FEMALE	0	0	18	ROOM	30
G254	18.3.2018	18	15	1	MALE	0	0	18	ROOM	25
G260	20.3.2018	20	16	1	MALE	0	0	18	ROOM	10
G262	16.3.2018	16	12	1	FEMALE	0	0	18	ROOM	18
G263	17.3.2018	17	8	1	MALE	0	1	18.75	ROOM	9
G264	24.3.2018	24	8	1	MALE	0	1	18.25	ROOM	29
G276	23.3.2018	23	10	1	MALE	0	1	18.75	ROOM	1
G281	18.3.2018	18	5	1	MALE	0	0	18	ROOM	3
G297	20.3.2018	20	12	1	MALE	1	0	19.5	ROOM	19
G318	18.3.2018	18	9	1	FEMALE	1	0	19.25	ROOM	0
G319	27.3.2018	27	6	1	FEMALE	0	1	18	ROOM	21
G327	16.3.2018	16	2	1	MALE	0	0	19	ROOM	18
G342	22.3.2018	22	14	1	FEMALE	0	0	19.5	ROOM	13
G344	23.3.2018	23	8	1	MALE	1	1	20.25	ROOM	3
G346	19.3.2018	19	0	0	MALE	0	1	18	ROOM	5
G347	20.3.2018	20	0	0	FEMALE	0	0	16.75	ROOM	12
G348	21.3.2018	21	0	0	MALE	1	1	19	ROOM	6
G349	22.3.2018	22	0	0	FEMALE	0	0	16.75	ROOM	15
G350	23.3.2018	23	0	0	MALE	0	1	19.5	ROOM	9
G351	26.3.2018	26	0	0	MALE	0	0	18.5	ROOM	0
G352	26.3.2018	26	0	0	FEMALE	0	0	19.75	ROOM	16
G353	26.3.2018	26	0	0	FEMALE	0	0	19	ROOM	10
G354	27.3.2018	27	0	0	FEMALE	0	1	16.75	ROOM	0
G355	28.3.2018	28	0	0	MALE	1	0	18.5	ROOM	0
G356	27.3.2018	27	0	0	FEMALE	0	1	17.5	ROOM	20
G357	27.3.2018	27	0	0	FEMALE	1	1	16	ROOM	9
G358	28.3.2018	28	0	0	FEMALE	1	0	17	ROOM	0
G359	29.3.2018	29	0	0	MALE	0	0	17.5	ROOM	0
G360	29.3.2018	29	0	0	FEMALE	0	0	18.75	ROOM	17
G361	29.3.2018	29	0	0	MALE	0	0	18.5	ROOM	23
G362	29.3.2018	29	0	0	FEMALE	1	0	17.5	ROOM	18
G363	29.3.2018	29	0	0	FEMALE	0	0	17.25	ROOM	11
G364	29.3.2018	29	0	0	MALE	0	1	17.75	ROOM	0
G365	29.3.2018	29	7	1	FEMALE	1	1	17.25	ROOM	11
G366	30.3.2018	30	0	0	FEMALE	0	1	16.75	ROOM	0
G367	30.3.2018	30	0	0	MALE	0	1	17	ROOM	1
G368	30.3.2018	30	0	0	MALE	0	0	18.5	ROOM	11
G369	30.3.2018	30	0	0	MALE	0	0	18.5	ROOM	0
G370	30.3.2018	30	0	0	FEMALE	0	0	17.25	ROOM	1
G371	30.3.2018	30	0	0	MALE	0	1	19.5	ROOM	10
G372	30.3.2018	30	0	0	MALE	1	1	19	ROOM	9
G373	31.3.2018	31	0	0	MALE	1	0	17	ROOM	13
G374	31.3.2018	31	0	0	FEMALE	0	0	16.5	ROOM	0
G375	31.3.2018	31	0	0	MALE	0	1	18.25	ROOM	6
G376	31.3.2018	31	0	0	MALE	0	1	19.5	ROOM	15
G68	17.3.2018	17	23	1	MALE	1	1	19.5	ROOM	3

## Sheet: variables explained
Variable name		Explanation
bird_id		Bird identity given to the birds at arrival in the research station
date_caught		Date the bird was caught
March_day		Date converted to March-days, where 1 = 1st of March, 15 = 15th of March etc.
days_captivity		The number of days a bird has spent in captivity prior to this study
experience		Discrete variable whether birds have been in captivity before, where 1 = has been in captivity before, 0 = has not been in captivity before
sex		sex of the bird, male or female
age		age of the bird 1 = bird older than 2 calendar years, 0 = bird born in previous spring (= 2 calendar years)
order_c.r		indicating whether the respective exploration value of the test (room or cage) was done first or last
bodyweight		bodyweight of the bird at arrival in the station to the nearest 0.25g
test		indicating from which test the exploration value was derived ( cage or room)
exploration_2m		number of movements in the first 2 minutes after the start of exploration
T_30breaths		time in seconds for a bird to take 30 breaths, this is the average over 2 measurements
breath_s		converted the time to take 30 breaths into the number of breath per second
Mir_pecks		number of pecks at the mirror during the social response behaviour test
T_looks		amount of time spent looking at the mirror during the social response behaviour test
Mir_look_s		converted the time spent looking at the mirror to proportion of time spent looking at the mirror (T_looks/ total time spent with the mirror (Time_in_mirror))
Perch2_mirror		time in seconds a bird spent on Perch 2 during the social response behaviour test (up and furthest away from the mirror)
Perch5_mirror		time in seconds a bird spent on Perch5 during the social response behaviour test (at level and closest to the mirror)
P2_mir		converted the time spent on Perch2 to proportion of time spent on Perch2 (Perch2_mirror/ total time spent with the mirror (Time_in_mirror))
P5_mir		converted the time spent on Perch5 to proportion of time spent on Perch5 (Perch5_mirror/ total time spent with the mirror (Time_in_mirror))
time_in_mirror		time spent in the social response behaviour tests (mirror exposure)
mov_mir		number of movements during the mirror exposure
mov_mir_s		converted the movements during mirror exposure to movements per second (mov_mir/time_in_mirror)
Perch2_expl		time in seconds a bird spent on Perch 2 during the exploration experiment in the cage
Perch5_expl		time in seconds a bird spent on Perch 5 during the exploration experiment in the cage
P2_expl		converted the time spent on Perch2 to proportion of time spent on Perch2 (Perch2_expl/ total time spent in the exploration side (time_expl_side))
P5_expl		converted the time spent on Perch5 to proportion of time spent on Perch5 (Perch5_expl/ total time spent in the exploration side (time_expl_side))
time_expl_side		time spent in the exploration side of the cage during the cage exploration test
moves_exploration		total number of movements during cage exploration
mov_expl_s		converted the movements during exploration to movements per second (moves_exploration/time_expl_side)
PC1		values of Principal Component 1
